# Supplementary material for: STEM Education in Vietnam: Examining the Impact of an Internationally Transferred Educational Approach
Source: Research Square preprint supplement (doi:10.21203/rs.3.rs-6345329/v1), 2025-05-12
Supplement: Supplementary file 1 [file d376a4e51b06ce286690a192.docx]

**Supplementary Information 1**

Legal documents promulgated to promote STEM education in Vietnam**.**

| **NUMBER/SYMBOL** | **DATE ISSUED** | **NAME OF LEGAL DOCUMENT** |
| --- | --- | --- |
| 58/2011/TT-BGDĐT | 12/12/2011 | Circular promulgating the regulation on assessment and grading of junior high school students and high school students |
| 38/2012/TT-BGDĐT | 02/11/2012 | [Circular promulgating regulations on national scientific and technical research exams for junior and senior high school students](https://stemtieuhoc.edu.vn/documents) |
| 3535/BGDĐT–GDTrH | 27/05/2013 | [Official letter with guidance on the implementation of active teaching methods](https://stemtieuhoc.edu.vn/documents) |
| 29-NQ/TW | 04/11/2013 | [Resolution on fundamental and comprehensive reform of education and training, meeting the requirements of industrialization and modernization in the conditions of socialist-oriented market economy and international integration](https://stemtieuhoc.edu.vn/documents) |
| 5555/BGDĐT–GDTrH | 08/10/2014 | [Official letter with guidance on professional activities in secondary schools, teaching method innovation, and examination and assessment](https://stemtieuhoc.edu.vn/documents) |
| 16/CT–TTg | 04/05/2017 | [Directive on strengthening the capacity to approach the Fourth Industrial Revolution](https://stemtieuhoc.edu.vn/documents) |
| 4612/BGDĐT–GDTrH | 03/10/2017 | [Official letter with guidance on the implementation of the current general education program in the orientation of developing students’ capacity and quality from the school year 2017-2018](https://stemtieuhoc.edu.vn/documents) |
| 32/2017/TT-BGDĐT | 19/12/2017 | [Circular amending and supplementing a number of articles of the regulation on national scientific and technical research exams for junior and senior high school students](https://stemtieuhoc.edu.vn/documents) |
| 522/QĐ–TTg | 14/05/2018 | [Decision approving the project on vocational education and orientation of student flow in general education in the period of 2018-2025](https://stemtieuhoc.edu.vn/documents) |
| 32/2018/TT-BGDĐT | 26/12/2018 | [Circular promulgating the general education program](https://stemtieuhoc.edu.vn/documents) |
| 52-NQ/TW | 27/09/2019 | [Resolution on a number of guidelines and policies to proactively participate in the Fourth Industrial Revolution](https://stemtieuhoc.edu.vn/documents) |
| 3089/BGDĐT–GDTrH | 14/08/2020 | [Official letter on the implementation of STEM education in secondary education](https://stemtieuhoc.edu.vn/documents) |
| 26/2020/TT-BGDĐT | 26/08/2020 | [Circular amending and supplementing a number of articles on the regulation on assessment and classification of junior high school students and general secondary school students.](https://stemtieuhoc.edu.vn/documents) |
| 5512/BGDĐT-GDTrH | 18/12/2020 | [Official dispatches on formulation and implementation of educational plans of lower secondary schools, upper secondary schools and upper secondary schools](https://stemtieuhoc.edu.vn/documents) |
| 22/2021/TT-BGDĐT | 20/07/2021 | [Circular regulating the assessment of junior high school students and high school students](https://stemtieuhoc.edu.vn/documents) |
| 131/QĐ-TTg | 25/01/2022 | [Decision of the Prime Minister approving the project “strengthening the application of information technology and digital transformation in education and training in the period of 2022-2025, with a vision to 2030”](https://stemtieuhoc.edu.vn/documents) |
| 526/KH-BGDDT | 17/05/2022 | [Plan on the pilot implementation of STEM education at the primary level at the primary level for seven provinces and cities: Lao Cai, Hanoi, Nam Dinh, Thua Thien - Hue, Dak Lak, Can Tho and Dong Thap](https://stemtieuhoc.edu.vn/documents) |
| 2918/BGDĐT-GDTH | 08/07/2022 | [Official Letter of the Ministry of Education and Training on the pilot implementation of STEM education at the primary level](https://stemtieuhoc.edu.vn/documents) |
| 4704/BGDĐT-GDTH | 22/09/2022 | [Official Letter of the Ministry of Education and Training on the pilot implementation of STEM education at the primary level](https://stemtieuhoc.edu.vn/documents) |
