# Supplementary material for: STEM Education in Vietnam: Examining the Impact of an Internationally Transferred Educational Approach
Source: Research Square preprint supplement (doi:10.21203/rs.3.rs-6345329/v1), 2025-05-12
Supplement: Supplementary file 2 [file d3bccbccb1b6ba83b2dc9dc4.docx]

**Supplementary Information 2**

English Translation of Metadata for Articles on STEM Education in Vietnam

| **No** | **Metadata** | **Abstract** |
| --- | --- | --- |
|  | **Reference:** Nguyen, Nguyen, & Ngo (2024)  **Title:** Current situation and solutions to improve the quality of teaching in STEM education in general schools: A case study in some northern provinces of Vietnam  **Keywords:** current situation, solutions, STEM education, Vietnam, teacher training | The paper delves into the state and challenges of STEM (Science, Technology, Engineering, and Mathematics) education in schools. By conducting an intensive survey, it offers insights into the current status of STEM education and highlights the perceptions and difficulties faced by educators in adopting STEM methodologies. The study reveals that while there's an increasing recognition of the importance of STEM in the natural sciences curriculum, several obstacles impede its full implementation. A significant challenge is the difficulty in correlating real-world issues with natural science subjects, making it tough for educators to make lessons engaging and relevant. Furthermore, the lack of appropriate educational tools and materials, combined with inadequate infrastructural facilities in schools, further hampers the quality of teaching. Moreover, the research identifies a gap in the training of educators. Many teachers are unfamiliar with STEM, lacking both understanding and confidence in the approach. This is exacerbated by time constraints in the classroom and insufficient support from parents. Additionally, the paper points out that only a limited number of natural science topics can be aptly integrated into STEM projects, creating a narrower scope for educators. To address these challenges, the paper suggests the need for better training for teachers specifically tailored to STEM requirements, more substantial institutional support, and fostering a closer relationship between STEM education and the broader natural sciences curriculum. |
|  | **Reference:** Dinh & Nguyen (2024)  **Title:** The Current Situation of Implementing Stem Education in High Schools in Dak Lak Province  **Keywords:** STEM Education, high school, Đắk Lắk province | STEM education is a modern educational model that is being implemented in the 2018 general education program to develop qualities, abilities, and career orientation for students. The article presents the results of understanding the current status of implementing STEM education at high schools in Dak Lak Province through a survey of 252 teachers from 12 high schools in the province. The results show that most teachers are aware of the role and significance of STEM education in forming and developing students’ abilities. The forms of organizing STEM education that teachers have implemented are STEM lessons, STEM experiential activities, and organizing scientific and technical research activities. However, teachers still have difficulty designing STEM lessons, so that it is necessary to continue in-depth training for teachers and strengthen facilities and teaching equipment to promote STEM educational activities in school next time. |
|  | **Reference:** Pham (2023)  **Title:** Management of Teaching Activities in Natural Sciences under STEM Education Orientation in Secondary Schools in Tua Chua District, Dien Bien Province  **Keywords:** Teaching management, STEM education, middle school, Tua Chua Dien Bien. | The STEM education-oriented Natural Science subject in the 2018 high school curriculum is characterized by an integrative, interdisciplinary educational method: The knowledge in the subject is an interdisciplinary, interdisciplinary integration of subjects such as physics, chemistry, biology, and other subjects. The amount of knowledge in these subjects is abstract and difficult to understand. The traditional method of imparting knowledge can cause dryness and boredom for students. Especially for middle school students when they enter puberty, with many complex physiological and psychological changes. The article presents the results of research on the content management of teaching activities in Natural Sciences according to STEM education orientation in secondary schools in Tua Chua district, Dien Bien province. |
|  | **Reference:** Pham & Nguyen (2023)  **Title:** The Status, Opportunities, Challenges and Some Lessons Learned of Implementation of STEM Education in Some High Schools in Thai Nguyen Province  **Keywords:** STEM, Solution, Status, High Schools, Thai Nguyen Province | This article presents the current situation, opportunities and challenges when implementing STEM education at high schools in Thai Nguyen province and some neighboring provinces. The difficulties in the process of implementing STEM seminars at high schools are typified and the authors recommend corresponding solutions to overcome problems such as lack of funding, lack of facilities, lack of determination, direction... Changing the attitude of teachers is an important reason of successful implementation. However, it is necessary to change the educational program architecture and the form of assessment. We should also mention four indispensable steps including: create value, create environment, create market, create demand for STEM learning from society like we did. The STEM teaching model that we built has not only been well received by high schools in Thai Nguyen province but also transferred to partners in Hanoi and Ho Chi Minh City with thousands of high school teachers and students participating in seminars, conferences, competitions, and STEM festivals. Thai Nguyen University of Technology has pioneered in bringing STEM education to society over the years together by sponsoring a large number of teaching materials which cost hundreds of million dongs |
|  | **Reference:** Nguyen (2023)  **Title:** The Current Situation of Implementing Stem Education in High Schools in Tuyen Quang Province  **Keywords:** Students’ competences, education renovation, high school student, STEM education | The 2018 general education program has been implemented at the upper secondary level since the school year 2022-2023 in the aim of fundamental and comprehensive renovation of education and training in the spirit of the Resolution No. 29-NQ/ TW. The article examines the actual situation of implementing STEM education in high schools in Tuyen Quang province. The results show that the majority of administrators and teachers had the adequate awareness of STEM education and the role of this educational model in the innovation of general education; the schools paid attention to direct the implementation of STEM teaching methods under the guidance of the Ministry of Education and Training; the teachers had skills in designing STEM educational activities and organized teaching using this model quite often; the majority of the high school students had quite positive learning attitude, initiative and interest in participating in STEM lessons; The efficiency of absorbing new knowledge and skills of applying knowledge and practical ability of students was improved. However, schools need to invest more in facilities and reference materials; increase the mobilization of resources outside the school; continue to foster and create opportunities for teachers to learn and exchange professional experiences to implement STEM education more effectively. |
|  | **Reference:** Ha & Ma (2023)  **Title**: Forms of Organization of STEM Educational Activities at Second School in Yen Son District, Tuyen Quang Province  **Keywords:** STEM, Organizational form; Stem educational activities; Yen Son; Tuyen Quang | The organizational forms of STEM educational activities in secondary schools, if organized with high efficiency, will contribute to the formation of student quality and capacity, and equip students with scientific knowledge associated with applications. used in practice. In the framework of this article, we analyze and clarify the following issues: The concept of STEM education; The significance of STEM education activities in secondary schools; Form of organization of STEM education activities in secondary schools; The reality of the form of organizing STEM education activities at secondary schools in Yen Son district, Tuyen Quang province. |
|  | **Reference:** Doan, Nguyen, Dinh, Nguyen, Nguyen, & Do (2023)  **Title:** Current Status of Developing Capacity in Designing and Organizing STEM Education Activities for Teachers in Tuyen Quang Province  **Keywords:** Capacity development, STEM education, teachers, Tuyen Quang | The ability to design and organize STEM educational activities plays an important role in teaching and education. We conducted a survey and evaluated the current status of strengthening the capacity of teachers in Tuyen Quang province to plan and organize STEM educational activities using practical research methods such as observation, interviews, and educational surveys. According to the findings of the study, teachers’ capacity to create and coordinate activities is regarded as good on average and low on average, with high evaluations concentrated on young teachers who teach world subjects. STEM is a STEM strength. The findings of the research serve as a foundation for policymakers to investigate and suggest acceptable development options. |
|  | **Reference:** Bui, Phan, & Nguyen (2023)  **Title:** Current Status of STEM Education for High School Students in Ho Chi Minh City  **Keywords:** STEM education, general education curriculum, STEM teaching, students | The general education curriculum issued in 2018 is being implemented, with many advantages in integrating STEM education into learning subjects and topics, contributing to the development of students’ qualities and capacities. With the aim of investigating the current status of STEM teaching organizations of educational institutions, and teachers’ capacity to use active teaching methods and STEM teaching forms, the article assesses the current situation of teachers’ STEM education application in teaching and conditions for applying STEM education in high schools. A survey was conducted with an online form with 200 teachers from public and private schools in Ho Chi Minh City. The survey results serve as a practical basis to help educational institutions take measures to improve STEM teaching in terms of content, methods, forms and teaching conditions. |
|  | **Reference:** Thai, Nguyen, & Le (2022)  **Title:** A Model of STEM Education Management in High Schools  **Keywords:** STEM, STEM education, management of STEM Education, high school | The rapid development of the fourth industrial revolution necessitates the promotion of education and training in order to create a team of qualified experts with the necessary abilities to satisfy the demands of the 4.0 era. It is a very important and urgent matter. STEM education has aided in the solution of this pressing issue. STEM education is widely respected and applied in industrialized countries. STEM has been encouraged and included in educational curricula at all levels in Vietnam. This article presents the model of STEM education management for high schools, which is in accordance with the contents and functions of educational management activities in schools. |
|  | **Reference:** Pham, Tran, & Phan (2022)  **Title:** Management of Experiential Activities in Teaching Natural Sciences based on STEM Education in Secondary Schools  **Keywords:** Management, experiential activities, Natural Sciences, STEM education. | A new point in the orientation of the 2018 General Education Program, stipulated by Resolution 88/2014/QH13 of the National Assembly, is to renovate general education curricula and textbooks in order to make basic and comprehensive changes in terms of quality and effectiveness of general education. Accordingly, the trend of teaching in the direction of integrating, mobilizing, and connecting related elements of many fields and sciences to solve practical problems, then apply experiential activities. As a popular trend, integrating STEM education is a modern approach, and natural sciences are suitable for the nature and requirements of educational activities. Management of experiential activities in teaching Natural Sciences based on STEM education has an important meaning in building a theoretical foundation for educational administrators to realize the requirements of developing learners’ competencies through the performance of educational management functions in order to achieve educational goals and meet the current requirements of comprehensive educational innovation. |
|  | **Reference:** Nguyen (2022)  **Title:** Concept on Management of STEM Education in Elementary Schools Following Participation Approach  **Keywords:** STEM Education, management of STEM education, participatory approach, primary school. | When discussing STEM, there are various concepts hence it also affects the way it is implemented in primary schools. The problem is how can principals manage STEM education scientifically and optimally exploit resources to support STEM education organizations effectively. Managing STEM education at primary schools according to a participatory approach will help link and coordinate mechanisms in using and mobilizing conditions and resources to effectively organize STEM education activities in schools. school. This requires a participatory role of stakeholders and decentralization of responsibility for each of the STEM education activities in primary schools. In other words, the management of STEM education in schools following the main participatory approach is understood as the leading and coordinating role of the parties involved and the coordination mechanism in the implementation process. |
|  | **Reference:** Nguyen (2022)  **Title:** STEM Teaching Management in School, Lessons from Practice in Ta Quang Buu Secondary and High school, Hai Ba Trung, Hanoi  **Keywords:** STEM teaching, STEM education, STEM Teaching management | Research around the world show a wide spectrum of how STEM teaching and education operate. Choosing a model that is suitable for Vietnam's practice is a question that needs to be studied. The paper mentions STEM teaching and STEM teaching management; general assessment of the implementation of STEM teaching and management of STEM teaching at Ta Quang Buu Secondary and High School, Hai Ba Trung District, Hanoi City. On that basis, some lessons have been drawn for the STEM teaching management in schools today. |
|  | **Reference:** Bui & Nguyen (2022)  **Title:** Solutions to The Development of STEM Education in Vietnam Secondary Schools  **Keywords:** STEM, STEM education, Integrated teaching, STEM lesson, STEM community | The paper presents the current situation of STEM education in Vietnamese secondary schools through a survey of the opinions of core mathematics teachers. As a result, the authors analyze the causes and propose some solutions to develop STEM education in secondary schools. The authors use practical research methods and expert methods. Research results show that the organization of teaching mathematics according to the STEM education model has many limitations, especially the ability to connect teachers of different subjects in teaching with an interdisciplinary approach. Therefore, the solutions proposed in the paper focus on renovating training content, fostering teachers and developing the STEM education community of secondary school teachers, and enhancing teachers’ ability to cooperate in designing and organizing of the school’s STEM educational activities. |
|  | **Reference:** Le (2021)  **Title:** STEM Education in the 2018 General Education Program: Orientations and Implementation  **Keywords:** STEM education, the 2018 general education program, orientation, organizational implementation | STEM education aims to develop human resources in the fields of Science, Technology, Engineering, and Mathematics to develop the level of science and technology, improve the competitiveness of the economy of each country. Depending on the development and context of each country, strategies, policies, and practices of STEM education vary widely. In Vietnam, STEM education has also received attention in recent years. However, the implementation of STEM education still faces many difficulties and challenges, especially in the context of implementing a new general education program. The article clarifies the nature of STEM education in a general sense, introduces some organizational orientations for implementing STEM education in high schools. Some proposed solutions will contribute to effective organization and strengthening of STEM education in high schools in the current context. |
